# Supplementary material
Source: PubMed Central journal article supplement (PMC1513423)
Supplement: cmaj_175_3_255__2.pdf [file cmaj_175_3_255__2.pdf]

**Annexe 2 : Étude de l'Université McGill sur la dépendance à la nicotine chez les adolescents**

[Also available in English at [www.cmaj.ca/cgi/content/full/175/3/255/DC1](http://www.cmaj.ca/cgi/content/full/175/3/255/DC1)]

**1. Quel est le mois de ton anniversaire ?**

- |                                       |         |                                        |           |
|---------------------------------------|---------|----------------------------------------|-----------|
| <input type="checkbox"/> <sub>1</sub> | Janvier | <input type="checkbox"/> <sub>7</sub>  | Juillet   |
| <input type="checkbox"/> <sub>2</sub> | Février | <input type="checkbox"/> <sub>8</sub>  | Août      |
| <input type="checkbox"/> <sub>3</sub> | Mars    | <input type="checkbox"/> <sub>9</sub>  | Septembre |
| <input type="checkbox"/> <sub>4</sub> | Avril   | <input type="checkbox"/> <sub>10</sub> | Octobre   |
| <input type="checkbox"/> <sub>5</sub> | Mai     | <input type="checkbox"/> <sub>11</sub> | Novembre  |
| <input type="checkbox"/> <sub>6</sub> | Juin    | <input type="checkbox"/> <sub>12</sub> | Décembre  |

**2. Quel est le jour de ton anniversaire ? *Encercle le chiffre exact.***

- |    |    |    |    |    |    |    |    |    |    |    |
|----|----|----|----|----|----|----|----|----|----|----|
| 1  | 2  | 3  | 4  | 5  | 6  | 7  | 8  | 9  | 10 |    |
| 11 | 12 | 13 | 14 | 15 | 16 | 17 | 18 | 19 | 20 |    |
| 21 | 22 | 23 | 24 | 25 | 26 | 27 | 28 | 29 | 30 | 31 |

**3. En quelle année es-tu né(e) ?**

- 1984
- 1985
- 1986
- 1987
- 1988
- Autre \_\_\_\_\_  
Précise l'année

**4. Quel âge as-tu aujourd'hui ? *Écris le chiffre dans la boîte.***

|  |     |
|--|-----|
|  | ans |
|--|-----|

**5. Es-tu....?**

- |                                       |           |                                       |           |
|---------------------------------------|-----------|---------------------------------------|-----------|
| <input type="checkbox"/> <sub>1</sub> | Un garçon | <input type="checkbox"/> <sub>2</sub> | Une fille |
|---------------------------------------|-----------|---------------------------------------|-----------|

6. La question suivante te demande : (1) avec quels adultes tu vis, et (2) si les adultes avec qui tu vis fument actuellement la cigarette.

Premièrement, coche la case si tu vis avec cette personne. Ensuite, pour les personnes avec qui tu vis, coche la case si il/elle fume actuellement la cigarette. Si tu vis dans plus d'une famille (à temps partagé avec ta mère et à temps partagé avec ton père), coche TOUTES les cases qui s'appliquent...

| Coche la boîte si ...  | Tu vis avec cette personne | Il / Elle fume actuellement la cigarette |
|------------------------|----------------------------|------------------------------------------|
| Mère biologique        | <input type="checkbox"/>   | <input type="checkbox"/>                 |
| Père biologique        | <input type="checkbox"/>   | <input type="checkbox"/>                 |
| Belle-mère             | <input type="checkbox"/>   | <input type="checkbox"/>                 |
| Beau-père              | <input type="checkbox"/>   | <input type="checkbox"/>                 |
| Tante(s)               | <input type="checkbox"/>   | <input type="checkbox"/>                 |
| Oncle(s)               | <input type="checkbox"/>   | <input type="checkbox"/>                 |
| Grand-mère(s)          | <input type="checkbox"/>   | <input type="checkbox"/>                 |
| Grand-père(s)          | <input type="checkbox"/>   | <input type="checkbox"/>                 |
| Autre(s) → Nomme-le(s) | <input type="checkbox"/>   | <input type="checkbox"/>                 |
| a) _____               | <input type="checkbox"/>   | <input type="checkbox"/>                 |
| b) _____               | <input type="checkbox"/>   | <input type="checkbox"/>                 |

7. Maintenant, pense à tes frères et sœurs (incluant tes beaux-frères/belles-sœurs et tes demi-frères et demi-sœurs). Écris le nombre exact dans la boîte. Si la réponse est zéro, inscris "0".

J'ai  frère(s)

J'ai  frère(s) qui fume(nt) la cigarette

J'ai  soeur(s)

J'ai  soeur(s) qui fume(nt) la cigarette



**12. Depuis combien de temps vis-tu au Canada ?**

J'ai vécu toute ma vie au Canada

OU

Je vis au Canada depuis moins d'un an

OU

Je vis au Canada depuis  an(s)

**13. Ton père biologique est né... ?**

<sub>1</sub> Au Canada → \_\_\_\_\_ OU <sub>7</sub> Je ne sais pas dans quelle province  
Indique dans quelle province

<sub>2</sub> À l'extérieur du Canada → \_\_\_\_\_ OU <sub>7</sub> Je ne sais pas dans quel pays  
Indique dans quel pays

<sub>7</sub> Je ne sais pas

**14. Ta mère biologique est née... ?**

<sub>1</sub> Au Canada → \_\_\_\_\_ OU <sub>7</sub> Je ne sais pas dans quelle province  
Indique dans quelle province

<sub>2</sub> À l'extérieur du Canada → \_\_\_\_\_ OU <sub>7</sub> Je ne sais pas dans quel pays  
Indique dans quel pays

<sub>7</sub> Je ne sais pas

**15. Pense à l'activité physique que tu as faite durant la dernière semaine, du lundi au dimanche, en dehors de tes cours réguliers d'éducation physique à l'école. Pour chaque activité que tu as effectuée pendant 5 minutes ou plus à la fois, fais un "X" pour indiquer les jours où tu as effectué cette activité.**

|                                                                             | Lun | Mar | Mer | Jeu | Ven | Sam | Dim |
|-----------------------------------------------------------------------------|-----|-----|-----|-----|-----|-----|-----|
| Aller à l'école en vélo, faire des courses à vélo, ou faire un tour de vélo |     |     |     |     |     |     |     |
| Nager/plonger                                                               |     |     |     |     |     |     |     |
| Basketball                                                                  |     |     |     |     |     |     |     |
| Balle-molle                                                                 |     |     |     |     |     |     |     |
| Football                                                                    |     |     |     |     |     |     |     |
| Soccer                                                                      |     |     |     |     |     |     |     |
| Volleyball                                                                  |     |     |     |     |     |     |     |
| Sports de raquettes (badminton, tennis)                                     |     |     |     |     |     |     |     |

|                                                                                                                                |  |  |  |  |  |  |  |
|--------------------------------------------------------------------------------------------------------------------------------|--|--|--|--|--|--|--|
| Hockey sur glace/hockey cosum                                                                                                  |  |  |  |  |  |  |  |
| Corde à danser                                                                                                                 |  |  |  |  |  |  |  |
| Ski alpin, planche à neige                                                                                                     |  |  |  |  |  |  |  |
| Ski de fond                                                                                                                    |  |  |  |  |  |  |  |
| Patins à glace                                                                                                                 |  |  |  |  |  |  |  |
| Patins à roues alignées, planche à roulette (skateboard)                                                                       |  |  |  |  |  |  |  |
| Gymnastique (barres asymétriques, poutre, acrobaties, trampoline)                                                              |  |  |  |  |  |  |  |
| Exercices, conditionnement physique ("push-ups", redressements assis, poids et altères, machines à exercices, "jumping jacks") |  |  |  |  |  |  |  |
| Jeux de balle (ballon chasseur, "kick-ball", balle au mur, se lancer la balle)                                                 |  |  |  |  |  |  |  |
| Athlétisme                                                                                                                     |  |  |  |  |  |  |  |
| Jeux ("tag", marelle)                                                                                                          |  |  |  |  |  |  |  |
| Ballet jazz/ballet classique                                                                                                   |  |  |  |  |  |  |  |
| Danse (aérobique, folklorique, à une fête)                                                                                     |  |  |  |  |  |  |  |
| Jeux extérieurs (grimper dans les arbres, cache-cache)                                                                         |  |  |  |  |  |  |  |
| Karaté/Judo/Tai Chi/Kung Fu                                                                                                    |  |  |  |  |  |  |  |
| Boxe, lutte                                                                                                                    |  |  |  |  |  |  |  |
| Tâches extérieures (tondre le gazon, ramasser les feuilles, jardiner)                                                          |  |  |  |  |  |  |  |
| Tâches ménagères (balayer, laver le plancher, passer la balayeuse)                                                             |  |  |  |  |  |  |  |
| Mélange de marche rapide, course, jogging                                                                                      |  |  |  |  |  |  |  |
| Marche                                                                                                                         |  |  |  |  |  |  |  |
| Course/jogging                                                                                                                 |  |  |  |  |  |  |  |
| Autre(s) → Nomme-le(s)                                                                                                         |  |  |  |  |  |  |  |
| a)                                                                                                                             |  |  |  |  |  |  |  |
| b)                                                                                                                             |  |  |  |  |  |  |  |
| c)                                                                                                                             |  |  |  |  |  |  |  |

16. **Depuis le mois de septembre de cette année scolaire, as-tu fait partie d'une équipe de sport intra-muros ou inter-scolaire à ton école (équipes qui ne font pas partie de ton cours régulier d'éducation physique) ?**

|                                    | Oui                      |
|------------------------------------|--------------------------|
| Équipe de basketball de ton école  | <input type="checkbox"/> |
| Équipe de soccer de ton école      | <input type="checkbox"/> |
| Équipe de football de ton école    | <input type="checkbox"/> |
| Équipe d'athlétisme de ton école   | <input type="checkbox"/> |
| Équipe de rugby de ton école       | <input type="checkbox"/> |
| Équipe de lutte de ton école       | <input type="checkbox"/> |
| Équipe de natation de ton école    | <input type="checkbox"/> |
| Équipe de balle-molle de ton école | <input type="checkbox"/> |
| Équipe de ski de fond de ton école | <input type="checkbox"/> |
| Équipe de volley-ball de ton école | <input type="checkbox"/> |
| Équipe de gymnastique de ton école | <input type="checkbox"/> |
| Équipe de hockey de ton école      | <input type="checkbox"/> |
| Autre(s) → Nomme-le(s)             |                          |
| a) _____                           |                          |
| b) _____                           |                          |

17. **Maintenant, pense à des sports d'équipe et à des cours à l'extérieur de l'école. Au cours des 3 derniers mois, as-tu fait partie d'une équipe ou as-tu suivi des cours... ?**

|                          | Oui                      |
|--------------------------|--------------------------|
| Une équipe de basketball | <input type="checkbox"/> |
| Une équipe de soccer     | <input type="checkbox"/> |
| Une équipe de football   | <input type="checkbox"/> |
| Une équipe de natation   | <input type="checkbox"/> |
| Une équipe de baseball   | <input type="checkbox"/> |

|                                 |                          |
|---------------------------------|--------------------------|
| Une équipe de volleyball        | <input type="checkbox"/> |
| Une équipe de hockey            | <input type="checkbox"/> |
| Des cours de ballet ou de danse | <input type="checkbox"/> |
| Des cours d'aérobic             | <input type="checkbox"/> |
| Des cours de ski                | <input type="checkbox"/> |
| Des cours de Judo/Karaté        | <input type="checkbox"/> |
| Autre(s) → Nomme-le(s)          |                          |
| a) _____                        |                          |
| b) _____                        |                          |

18. Habituellement, combien d'heures par jour passes-tu à regarder la télévision (incluant les films vidéo) ? Si la réponse est zéro, inscris "0". Si la réponse est moins qu'une demi-heure, inscris "MQ ½".

Habituellement, les jours de semaine, je regarde...  heure(s) de télévision par jour

Habituellement, les jours de fin de semaine, je regarde...  heure(s) de télévision par jour

19. Habituellement, combien d'heures par jour joues-tu à des jeux vidéo ou d'ordinateur, ou utilises-tu l'Internet ? Si la réponse est zéro, inscris "0". Si la réponse est moins qu'une demi-heure, inscris "MQ ½".

Habituellement, les jours de semaine, je joue...  heure(s) par jour

Habituellement, les jours de fin de semaine, je joue...  heure(s) par jour

20. **Au cours des 3 derniers mois, à quelle fréquence... ?**

|                                                              | Jamais                                | Rarement                              | Parfois                               | Souvent                               |
|--------------------------------------------------------------|---------------------------------------|---------------------------------------|---------------------------------------|---------------------------------------|
| T'es-tu senti(e) trop fatigué(e) pour faire certaines choses | <input type="checkbox"/> <sub>1</sub> | <input type="checkbox"/> <sub>2</sub> | <input type="checkbox"/> <sub>3</sub> | <input type="checkbox"/> <sub>4</sub> |
| As-tu eu de la difficulté à t'endormir ou rester endormi(e)  | <input type="checkbox"/> <sub>1</sub> | <input type="checkbox"/> <sub>2</sub> | <input type="checkbox"/> <sub>3</sub> | <input type="checkbox"/> <sub>4</sub> |
| T'es-tu senti(e) malheureux(se), triste ou déprimé(e)        | <input type="checkbox"/> <sub>1</sub> | <input type="checkbox"/> <sub>2</sub> | <input type="checkbox"/> <sub>3</sub> | <input type="checkbox"/> <sub>4</sub> |
| T'es-tu senti(e) désespéré(e) à propos de ton futur          | <input type="checkbox"/> <sub>1</sub> | <input type="checkbox"/> <sub>2</sub> | <input type="checkbox"/> <sub>3</sub> | <input type="checkbox"/> <sub>4</sub> |
| T'es-tu senti(e) nerveux(se) ou tendu(e)                     | <input type="checkbox"/> <sub>1</sub> | <input type="checkbox"/> <sub>2</sub> | <input type="checkbox"/> <sub>3</sub> | <input type="checkbox"/> <sub>4</sub> |
| T'es-tu trop inquiété(e) à propos de certaines choses        | <input type="checkbox"/> <sub>1</sub> | <input type="checkbox"/> <sub>2</sub> | <input type="checkbox"/> <sub>3</sub> | <input type="checkbox"/> <sub>4</sub> |

21. **Au cours des 3 derniers mois, as-tu été anxieux(se) ou stressé(e) par les éléments qui suivent... ?**

|                                            | Pas du tout OU Ne s'applique pas à moi | Un peu                                | Assez                                 | Beaucoup                              |
|--------------------------------------------|----------------------------------------|---------------------------------------|---------------------------------------|---------------------------------------|
| Le divorce ou la séparation de tes parents | <input type="checkbox"/> <sub>1</sub>  | <input type="checkbox"/> <sub>2</sub> | <input type="checkbox"/> <sub>3</sub> | <input type="checkbox"/> <sub>4</sub> |
| La solitude                                | <input type="checkbox"/> <sub>1</sub>  | <input type="checkbox"/> <sub>2</sub> | <input type="checkbox"/> <sub>3</sub> | <input type="checkbox"/> <sub>4</sub> |
| La rupture avec ton copain ou ta copine    | <input type="checkbox"/> <sub>1</sub>  | <input type="checkbox"/> <sub>2</sub> | <input type="checkbox"/> <sub>3</sub> | <input type="checkbox"/> <sub>4</sub> |
| Ta relation avec ton père                  | <input type="checkbox"/> <sub>1</sub>  | <input type="checkbox"/> <sub>2</sub> | <input type="checkbox"/> <sub>3</sub> | <input type="checkbox"/> <sub>4</sub> |
| Ta relation avec ta mère                   | <input type="checkbox"/> <sub>1</sub>  | <input type="checkbox"/> <sub>2</sub> | <input type="checkbox"/> <sub>3</sub> | <input type="checkbox"/> <sub>4</sub> |



|                                                    |                                       |                                       |                                       |                                       |
|----------------------------------------------------|---------------------------------------|---------------------------------------|---------------------------------------|---------------------------------------|
| Ta relation avec ton/tes frère(s) / ta/tes sœur(s) | <input type="checkbox"/> <sub>1</sub> | <input type="checkbox"/> <sub>2</sub> | <input type="checkbox"/> <sub>3</sub> | <input type="checkbox"/> <sub>4</sub> |
| Ta relation avec tes ami(e)s                       | <input type="checkbox"/> <sub>1</sub> | <input type="checkbox"/> <sub>2</sub> | <input type="checkbox"/> <sub>3</sub> | <input type="checkbox"/> <sub>4</sub> |
| Un problème de santé (tel que l'acné, l'asthme)    | <input type="checkbox"/> <sub>1</sub> | <input type="checkbox"/> <sub>2</sub> | <input type="checkbox"/> <sub>3</sub> | <input type="checkbox"/> <sub>4</sub> |
| Ton poids                                          | <input type="checkbox"/> <sub>1</sub> | <input type="checkbox"/> <sub>2</sub> | <input type="checkbox"/> <sub>3</sub> | <input type="checkbox"/> <sub>4</sub> |
| Les relations sexuelles                            | <input type="checkbox"/> <sub>1</sub> | <input type="checkbox"/> <sub>2</sub> | <input type="checkbox"/> <sub>3</sub> | <input type="checkbox"/> <sub>4</sub> |
| Ta nouvelle famille (famille reconstituée)         | <input type="checkbox"/> <sub>1</sub> | <input type="checkbox"/> <sub>2</sub> | <input type="checkbox"/> <sub>3</sub> | <input type="checkbox"/> <sub>4</sub> |
| Des problèmes financiers dans ta famille           | <input type="checkbox"/> <sub>1</sub> | <input type="checkbox"/> <sub>2</sub> | <input type="checkbox"/> <sub>3</sub> | <input type="checkbox"/> <sub>4</sub> |
| Les travaux scolaires                              | <input type="checkbox"/> <sub>1</sub> | <input type="checkbox"/> <sub>2</sub> | <input type="checkbox"/> <sub>3</sub> | <input type="checkbox"/> <sub>4</sub> |
| Autre(s) → Nomme-le(s)                             |                                       |                                       |                                       |                                       |
| a) _____                                           | <input type="checkbox"/> <sub>1</sub> | <input type="checkbox"/> <sub>2</sub> | <input type="checkbox"/> <sub>3</sub> | <input type="checkbox"/> <sub>4</sub> |
| b) _____                                           | <input type="checkbox"/> <sub>1</sub> | <input type="checkbox"/> <sub>2</sub> | <input type="checkbox"/> <sub>3</sub> | <input type="checkbox"/> <sub>4</sub> |

**22. Au cours des 3 derniers mois, à quelle fréquence as-tu...?**

|                                                 | JAMAIS                                | Un peu pour essayer                   | Une fois ou quelques fois par mois    | Une fois ou quelques fois par semaine | Habituellement chaque jour            |
|-------------------------------------------------|---------------------------------------|---------------------------------------|---------------------------------------|---------------------------------------|---------------------------------------|
| Fumé un cigare ou un cigarillo                  | <input type="checkbox"/> <sub>1</sub> | <input type="checkbox"/> <sub>2</sub> | <input type="checkbox"/> <sub>3</sub> | <input type="checkbox"/> <sub>4</sub> | <input type="checkbox"/> <sub>5</sub> |
| Utilisé du tabac à chiquer ou du tabac à priser | <input type="checkbox"/> <sub>1</sub> | <input type="checkbox"/> <sub>2</sub> | <input type="checkbox"/> <sub>3</sub> | <input type="checkbox"/> <sub>4</sub> | <input type="checkbox"/> <sub>5</sub> |
| Bu de l'alcool (bière, vin, autre alcool)       | <input type="checkbox"/> <sub>1</sub> | <input type="checkbox"/> <sub>2</sub> | <input type="checkbox"/> <sub>3</sub> | <input type="checkbox"/> <sub>4</sub> | <input type="checkbox"/> <sub>5</sub> |

23. Les prochaines questions portent sur ton expérience avec la cigarette. Pour commencer, as-tu déjà DE TA VIE fumé la cigarette, même si c'est juste une bouffée ?

- <sub>1</sub> Non
- <sub>2</sub> Oui, 1 ou 2 fois
- <sub>3</sub> Oui, 3 ou 4 fois
- <sub>4</sub> Oui, 5 ou 10 fois
- <sub>5</sub> Oui, plus de 10 fois

24. Coche la case qui te décrit le mieux.

- <sub>1</sub> Je n'ai jamais fumé la cigarette → *Va à la question 32*
- <sub>2</sub> J'ai déjà fumé la cigarette (même une seule bouffée), mais pas depuis les douze derniers mois
- <sub>3</sub> J'ai fumé la cigarette une ou plusieurs fois durant les douze derniers mois
- <sub>4</sub> Je fume la cigarette une ou plusieurs fois par mois
- <sub>5</sub> Je fume la cigarette une ou plusieurs fois par semaine
- <sub>6</sub> Je fume la cigarette tous les jours

25. As-tu déjà fumé une cigarette au complet (jusqu'au filtre ou près du filtre) ?

- <sub>1</sub> Non → *Va à la question 28*
- <sub>2</sub> Oui

26. Quel âge avais-tu lorsque tu as fumé une cigarette au complet (jusqu'au filtre ou près du filtre) pour la première fois ?

J'avais  ans  
inscris l'âge

OU

- <sub>7</sub> Je ne me souviens pas

27. **As-tu fumé 100 cigarettes au complet ou plus au cours de ta vie ?  
(100 cigarettes = 4 paquets de 25 cigarettes)**

<sub>1</sub> Non

<sub>2</sub> Oui

28. **As-tu déjà respiré profondément jusque dans tes poumons plus d'une bouffée de cigarette ?**

<sub>1</sub> Non → Va à la question 31

<sub>2</sub> Oui

29. **Quel âge avais-tu lorsque tu as respiré profondément jusque dans tes poumons plus d'une bouffée de cigarette ?**

J'avais  ans  
inscris l'âge

OU

<sub>7</sub> Je ne me souviens pas

30. **Les PREMIÈRES FOIS que tu as respiré profondément jusque dans tes poumons la fumée de cigarette, jusqu'à quel point as-tu ressenti les symptômes suivants... ?**

|                               | Pas du tout                           | Un peu                                | Beaucoup                              |
|-------------------------------|---------------------------------------|---------------------------------------|---------------------------------------|
| Toux                          | <input type="checkbox"/> <sub>1</sub> | <input type="checkbox"/> <sub>2</sub> | <input type="checkbox"/> <sub>3</sub> |
| Brûlement dans la gorge       | <input type="checkbox"/> <sub>1</sub> | <input type="checkbox"/> <sub>2</sub> | <input type="checkbox"/> <sub>3</sub> |
| Mal de ventre                 | <input type="checkbox"/> <sub>1</sub> | <input type="checkbox"/> <sub>2</sub> | <input type="checkbox"/> <sub>3</sub> |
| Battements cardiaques rapides | <input type="checkbox"/> <sub>1</sub> | <input type="checkbox"/> <sub>2</sub> | <input type="checkbox"/> <sub>3</sub> |
| Étourdissements               | <input type="checkbox"/> <sub>1</sub> | <input type="checkbox"/> <sub>2</sub> | <input type="checkbox"/> <sub>3</sub> |
| Mal de cœur                   | <input type="checkbox"/> <sub>1</sub> | <input type="checkbox"/> <sub>2</sub> | <input type="checkbox"/> <sub>3</sub> |
| Mal de tête                   | <input type="checkbox"/> <sub>1</sub> | <input type="checkbox"/> <sub>2</sub> | <input type="checkbox"/> <sub>3</sub> |
| Autre(s) → Nomme-le(s)        |                                       |                                       |                                       |
| a) _____                      | <input type="checkbox"/> <sub>1</sub> | <input type="checkbox"/> <sub>2</sub> | <input type="checkbox"/> <sub>3</sub> |
| b) _____                      | <input type="checkbox"/> <sub>1</sub> | <input type="checkbox"/> <sub>2</sub> | <input type="checkbox"/> <sub>3</sub> |

31. **Dirais-tu que tu es une personne qui a essayé de fumer la cigarette, mais qui a cessé de fumer complètement et (probablement) pour toujours ?**

- <sub>1</sub> Non
- <sub>2</sub> Oui
- <sub>7</sub> Je ne sais pas

32. **Lorsque tu vois d'autres jeunes de ton âge fumer, est-ce facile pour toi de ne pas fumer ?**

- <sub>1</sub> Très facile de ne pas fumer
- <sub>2</sub> Assez facile de ne pas fumer
- <sub>3</sub> Un peu difficile de ne pas fumer
- <sub>4</sub> Très difficile de ne pas fumer

33. **À quelle fréquence as-tu déjà ressenti que tu avais vraiment besoin de fumer une cigarette ?**

- <sub>1</sub> Jamais
- <sub>2</sub> Rarement
- <sub>3</sub> Parfois
- <sub>4</sub> Souvent

34. **Quel est ton niveau de dépendance physique à la cigarette ?**

- <sub>1</sub> Pas du tout dépendant(e) physiquement
- <sub>2</sub> Un peu dépendant(e) physiquement
- <sub>3</sub> Assez dépendant(e) physiquement
- <sub>4</sub> Très dépendant(e) physiquement

**35. Quel est ton niveau de dépendance psychologique à la cigarette ?**

- <sub>1</sub> Pas du tout dépendant(e) psychologiquement
- <sub>2</sub> Un peu dépendant(e) psychologiquement
- <sub>3</sub> Assez dépendant(e) psychologiquement
- <sub>4</sub> Très dépendant(e) psychologiquement

**36. Est-il facile pour toi de te procurer des cigarettes ?**

- <sub>1</sub> Très facile de me procurer des cigarettes
- <sub>2</sub> Assez facile de me procurer des cigarettes
- <sub>3</sub> Un peu difficile de me procurer des cigarettes
- <sub>4</sub> Très difficile de me procurer des cigarettes
- <sub>7</sub> Je ne sais pas (je n'ai jamais essayé de me procurer des cigarettes)
- <sub>8</sub> Je ne fume pas

**INSTRUCTIONS:** Maintenant, pense attentivement à ton expérience avec la cigarette durant les 3 derniers mois, c'est-à-dire, septembre, octobre et novembre. Commençons par novembre.

**37. Pendant le mois de novembre, combien de jours as-tu fumé la cigarette, même si c'est juste une bouffée ?**

- <sub>1</sub> Aucun →Va à la question 40
- <sub>2</sub> 1 jour
- <sub>3</sub> 2-3 jours
- <sub>4</sub> 4-5 jours
- <sub>5</sub> 6-10 jours
- <sub>6</sub> 11-15 jours
- <sub>7</sub> 16-20 jours
- <sub>8</sub> 21-30 jours
- <sub>9</sub> Chaque jour
- <sub>77</sub> Je ne sais pas

38. Les jours où tu as fumé en novembre, combien de cigarettes as-tu fumées par jour habituellement ?

- <sub>1</sub> Moins d'une cigarette (une ou plusieurs bouffées)
- <sub>2</sub> 1 cigarette
- <sub>3</sub> 2 à 3 cigarettes
- <sub>4</sub> 4 à 5 cigarettes
- <sub>5</sub> 6 à 10 cigarettes
- <sub>6</sub> 11 à 15 cigarettes
- <sub>7</sub> 16 à 20 cigarettes
- <sub>8</sub> 21 à 25 cigarettes
- <sub>9</sub> Plus de 25 cigarettes
- <sub>77</sub> Je ne sais pas

39. Écris le chiffre exact dans la case. Durant le mois de novembre, le plus grand nombre de cigarettes que j'ai fumées dans une journée était...

cigarettes

OU

- Moins d'une cigarette (une ou plusieurs bouffées)
- OU
- <sub>77</sub> Je ne sais pas

40. Pendant le mois d'octobre, combien de jours as-tu fumé la cigarette, même si c'est juste une bouffée ?

- <sub>1</sub> Aucun → Va à la question 43
- <sub>2</sub> 1 jour
- <sub>3</sub> 2-3 jours
- <sub>4</sub> 4-5 jours
- <sub>5</sub> 6-10 jours
- <sub>6</sub> 11-15 jours

- <sub>7</sub> 16-20 jours
- <sub>8</sub> 21-30 jours
- <sub>9</sub> Chaque jour
- <sub>77</sub> Je ne sais pas

41. **Les jours où tu as fumé en octobre, combien de cigarettes as-tu fumées par jour habituellement ?**

- <sub>1</sub> Moins d'une cigarette (une ou plusieurs bouffées)
- <sub>2</sub> 1 cigarette
- <sub>3</sub> 2 à 3 cigarettes
- <sub>4</sub> 4 à 5 cigarettes
- <sub>5</sub> 6 à 10 cigarettes
- <sub>6</sub> 11 à 15 cigarettes
- <sub>7</sub> 16 à 20 cigarettes
- <sub>8</sub> 21 à 25 cigarettes
- <sub>9</sub> Plus de 25 cigarettes
- <sub>77</sub> Je ne sais pas

42. **Écris le chiffre exact dans la case. Durant le mois d'octobre, le plus grand nombre de cigarettes que j'ai fumées dans une journée était...**

cigarettes

OU

- Moins d'une cigarette (une ou plusieurs bouffées)  
OU
- <sub>77</sub> Je ne sais pas

**43. Pendant le mois de septembre, combien de jours as-tu fumé la cigarette, même si c'est juste une bouffée ?**

- <sub>1</sub> Aucun → *Va à la question 46*
- <sub>2</sub> 1 jour
- <sub>3</sub> 2-3 jours
- <sub>4</sub> 4-5 jours
- <sub>5</sub> 6-10 jours
- <sub>6</sub> 11-15 jours
- <sub>7</sub> 16-20 jours
- <sub>8</sub> 21-30 jours
- <sub>9</sub> Chaque jour
- <sub>77</sub> Je ne sais pas

**44. Les jours où tu as fumé en septembre, combien de cigarettes as-tu fumées par jour habituellement ?**

- <sub>1</sub> Moins d'une cigarette (une ou plusieurs bouffées)
- <sub>2</sub> 1 cigarette
- <sub>3</sub> 2 à 3 cigarettes
- <sub>4</sub> 4 à 5 cigarettes
- <sub>5</sub> 6 à 10 cigarettes
- <sub>6</sub> 11 à 15 cigarettes
- <sub>7</sub> 16 à 20 cigarettes
- <sub>8</sub> 21 à 25 cigarettes
- <sub>9</sub> Plus de 25 cigarettes
- <sub>77</sub> Je ne sais pas



45. Écris le chiffre exact dans la case. Durant le mois de septembre, le plus grand nombre de cigarettes que j'ai fumées dans une journée était...

cigarettes

OU

Moins d'une cigarette (une ou plusieurs bouffées)

OU

Je ne sais pas

46. Maintenant, pense aux 7 derniers jours. As-tu fumé la cigarette au cours des 7 derniers jours, même si c'est juste une bouffée ?

Non → Va aux **INSTRUCTIONS** au bas de la page suivante

Oui

47. En commençant avec hier qui était \_\_\_\_\_, suis les flèches et écris dans la case le nombre de cigarettes que tu as fumées chaque jour. Si une réponse est zéro, inscris "0".

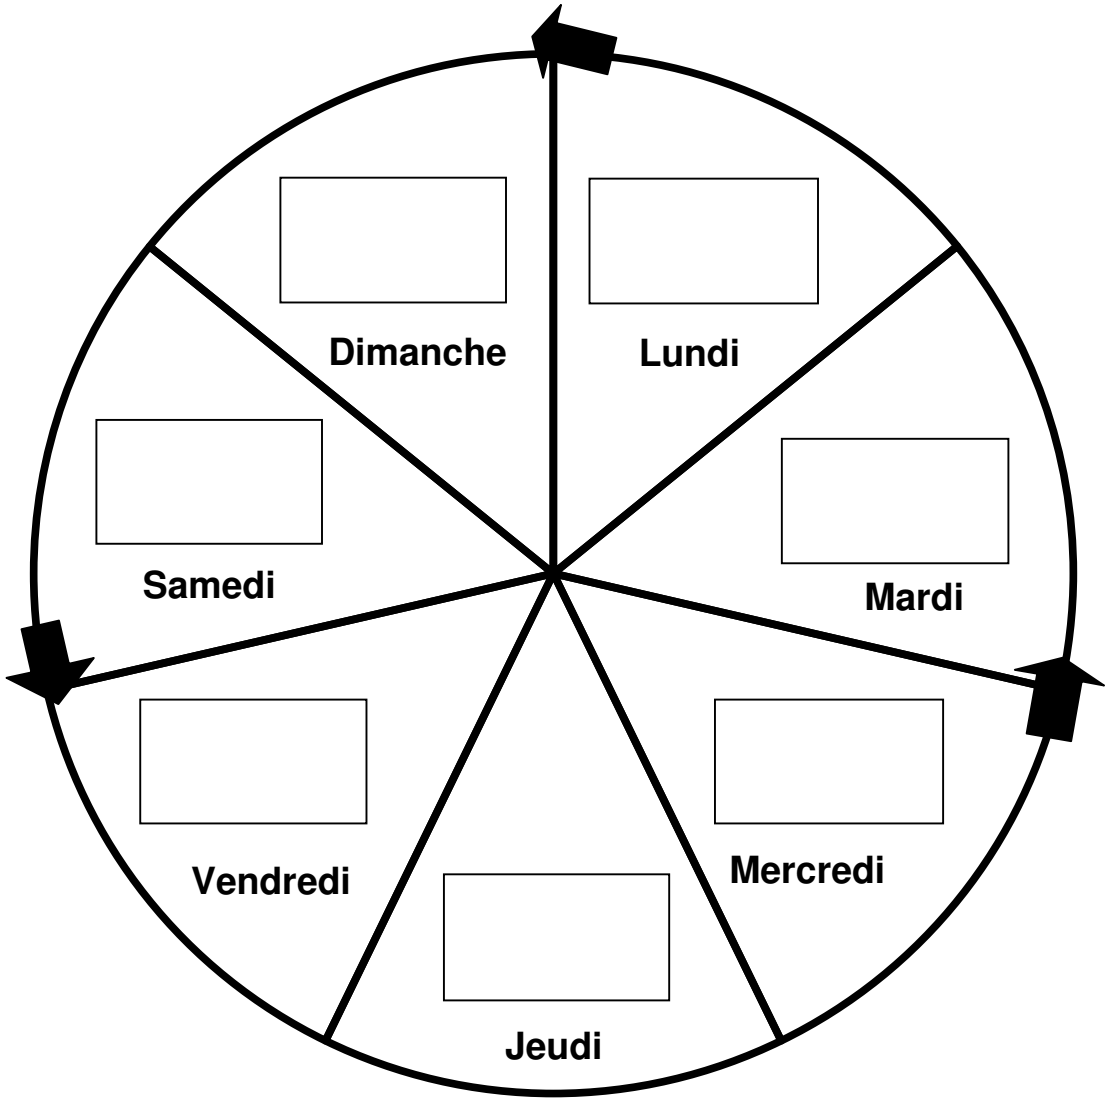

**INSTRUCTIONS** : Le reste du questionnaire est seulement pour les étudiant(e)s qui ont fumé la cigarette, même seulement une bouffée, dans les 3 derniers mois. Si tu n'as pas fumé du tout la cigarette durant les 3 derniers mois, s'il te plaît va à la fin du questionnaire et travaille tranquillement sur le MOT SUPER.

**48. À quelle fréquence fumes-tu la cigarette... ?**

|                                            | <b>Jamais</b>                         | <b>Parfois</b>                        | <b>Souvent/<br/>Toujours</b>          |
|--------------------------------------------|---------------------------------------|---------------------------------------|---------------------------------------|
| Lorsque tu attends l'autobus               | <input type="checkbox"/> <sub>1</sub> | <input type="checkbox"/> <sub>2</sub> | <input type="checkbox"/> <sub>3</sub> |
| Après un repas                             | <input type="checkbox"/> <sub>1</sub> | <input type="checkbox"/> <sub>2</sub> | <input type="checkbox"/> <sub>3</sub> |
| Lorsque tu te rends à l'école le matin     | <input type="checkbox"/> <sub>1</sub> | <input type="checkbox"/> <sub>2</sub> | <input type="checkbox"/> <sub>3</sub> |
| Lorsque tu reviens de l'école l'après-midi | <input type="checkbox"/> <sub>1</sub> | <input type="checkbox"/> <sub>2</sub> | <input type="checkbox"/> <sub>3</sub> |
| Lorsque tu es seul(e)                      | <input type="checkbox"/> <sub>1</sub> | <input type="checkbox"/> <sub>2</sub> | <input type="checkbox"/> <sub>3</sub> |
| Lorsque tu es avec tes ami(e)s             | <input type="checkbox"/> <sub>1</sub> | <input type="checkbox"/> <sub>2</sub> | <input type="checkbox"/> <sub>3</sub> |
| À la maison                                | <input type="checkbox"/> <sub>1</sub> | <input type="checkbox"/> <sub>2</sub> | <input type="checkbox"/> <sub>3</sub> |
| Les fins de semaine                        | <input type="checkbox"/> <sub>1</sub> | <input type="checkbox"/> <sub>2</sub> | <input type="checkbox"/> <sub>3</sub> |
| Au dîner ou entre les cours à l'école      | <input type="checkbox"/> <sub>1</sub> | <input type="checkbox"/> <sub>2</sub> | <input type="checkbox"/> <sub>3</sub> |
| En soirée, les jours d'école               | <input type="checkbox"/> <sub>1</sub> | <input type="checkbox"/> <sub>2</sub> | <input type="checkbox"/> <sub>3</sub> |

**49. Est-ce que tes parents (ou l'un de tes parents) savent (sait) que tu fumes (ou que tu as fumé) la cigarette ?**

- <sub>1</sub> Non
- <sub>2</sub> Oui
- <sub>7</sub> Je ne sais pas

**50. As-tu la permission de fumer à l'intérieur de ta maison ?**

- <sub>1</sub> Non
- <sub>2</sub> Oui

51. **Actuellement, fumes-tu la cigarette parce qu'il est vraiment trop difficile d'arrêter de fumer ?**

- <sub>1</sub> Non
- <sub>2</sub> Parfois
- <sub>3</sub> Souvent/toujours
- <sub>4</sub> Je ne sais pas car je n'ai jamais essayé d'arrêter
- <sub>5</sub> Autre → Explique \_\_\_\_\_
- <sub>7</sub> Je ne sais pas (je fume très peu) ou ne s'applique pas à moi

52. **Habituellement lorsque tu fumes une cigarette, jusqu'à quel point la fumes-tu ?**

- <sub>1</sub> Je fume une ou quelques bouffées
- <sub>2</sub> Je fume moins de la moitié de la cigarette
- <sub>3</sub> Je fume environ la moitié de la cigarette
- <sub>4</sub> Je fume la plupart de la cigarette
- <sub>5</sub> Je la fume jusqu'au filtre ou presque
- <sub>7</sub> Je ne sais pas (je fume très peu) ou ne s'applique pas à moi

53. **Maintenant, pense à toutes les fois que tu as diminué ta consommation de cigarettes ou que tu as cessé de fumer ou que tu n'as pas pu fumer une cigarette pendant une période de temps prolongé (comme presque toute une journée). Combien de fois as-tu ressenti les effets suivants... ?**

|                                                  | Jamais                                | Rarement                              | Parfois                               | Souvent                               |
|--------------------------------------------------|---------------------------------------|---------------------------------------|---------------------------------------|---------------------------------------|
| Être irritable ou fâché(e)                       | <input type="checkbox"/> <sub>1</sub> | <input type="checkbox"/> <sub>2</sub> | <input type="checkbox"/> <sub>3</sub> | <input type="checkbox"/> <sub>4</sub> |
| Être agité(e)                                    | <input type="checkbox"/> <sub>1</sub> | <input type="checkbox"/> <sub>2</sub> | <input type="checkbox"/> <sub>3</sub> | <input type="checkbox"/> <sub>4</sub> |
| Avoir plus d'appétit ou avoir faim               | <input type="checkbox"/> <sub>1</sub> | <input type="checkbox"/> <sub>2</sub> | <input type="checkbox"/> <sub>3</sub> | <input type="checkbox"/> <sub>4</sub> |
| Avoir une fréquence cardiaque ralentie           | <input type="checkbox"/> <sub>1</sub> | <input type="checkbox"/> <sub>2</sub> | <input type="checkbox"/> <sub>3</sub> | <input type="checkbox"/> <sub>4</sub> |
| Te sentir nerveux(se), anxieux(se) ou stressé(e) | <input type="checkbox"/> <sub>1</sub> | <input type="checkbox"/> <sub>2</sub> | <input type="checkbox"/> <sub>3</sub> | <input type="checkbox"/> <sub>4</sub> |

|                                        |                                       |                                       |                                       |                                       |
|----------------------------------------|---------------------------------------|---------------------------------------|---------------------------------------|---------------------------------------|
| Te sentir déprimé(e) ou triste         | <input type="checkbox"/> <sub>1</sub> | <input type="checkbox"/> <sub>2</sub> | <input type="checkbox"/> <sub>3</sub> | <input type="checkbox"/> <sub>4</sub> |
| Avoir de la difficulté à te concentrer | <input type="checkbox"/> <sub>1</sub> | <input type="checkbox"/> <sub>2</sub> | <input type="checkbox"/> <sub>3</sub> | <input type="checkbox"/> <sub>4</sub> |
| Te sentir endormi(e) ou somnoler       | <input type="checkbox"/> <sub>1</sub> | <input type="checkbox"/> <sub>2</sub> | <input type="checkbox"/> <sub>3</sub> | <input type="checkbox"/> <sub>4</sub> |
| Avoir des maux de tête                 | <input type="checkbox"/> <sub>1</sub> | <input type="checkbox"/> <sub>2</sub> | <input type="checkbox"/> <sub>3</sub> | <input type="checkbox"/> <sub>4</sub> |
| Avoir des maux de ventre               | <input type="checkbox"/> <sub>1</sub> | <input type="checkbox"/> <sub>2</sub> | <input type="checkbox"/> <sub>3</sub> | <input type="checkbox"/> <sub>4</sub> |
| Avoir une forte envie de fumer         | <input type="checkbox"/> <sub>1</sub> | <input type="checkbox"/> <sub>2</sub> | <input type="checkbox"/> <sub>3</sub> | <input type="checkbox"/> <sub>4</sub> |
| Avoir de la difficulté à dormir        | <input type="checkbox"/> <sub>1</sub> | <input type="checkbox"/> <sub>2</sub> | <input type="checkbox"/> <sub>3</sub> | <input type="checkbox"/> <sub>4</sub> |

54. **Les jours où tu fumes, quand fumes-tu habituellement ta première cigarette de la journée ?**

- <sub>1</sub> Immédiatement lorsque je me réveille
- <sub>2</sub> Le matin
- <sub>3</sub> Durant l'après-midi
- <sub>4</sub> Durant la soirée
- <sub>5</sub> À un autre moment \_\_\_\_\_  
Quand ?
- <sub>7</sub> Je ne sais pas (je fume très peu) ou ne s'applique pas à moi

55. **Quelle cigarette trouverais-tu la plus difficile à abandonner ?  
Coche UNE case.**

- <sub>1</sub> La dernière de la journée
- <sub>2</sub> La première du matin
- <sub>3</sub> Après les repas
- <sub>4</sub> Avec de l'alcool
- <sub>5</sub> Lorsque je ressens des émotions négatives, tel qu'être fâché(e)
- <sub>6</sub> Après l'école
- <sub>7</sub> Lorsque je suis à un "party" ou avec des ami(e)s
- <sub>8</sub> Autre \_\_\_\_\_  
Précise
- <sub>77</sub> Je ne sais pas (je fume très peu) ou ne s'applique pas à moi

56. **Es-ce que tu trouves difficile de ne pas fumer dans les endroits où c'est interdit (au cinéma, à la maison si tes parents ne savent pas que tu fumes) ?**

- <sub>1</sub> Pas difficile du tout
- <sub>2</sub> Un peu difficile
- <sub>3</sub> Très difficile
- <sub>7</sub> Je ne sais pas (je fume très peu) ou ne s'applique pas à moi

57. **Lorsque tu as un gros rhume ou un mal de gorge, fumes-tu ?**

- <sub>1</sub> Non, j'arrête de fumer lorsque je suis malade
- <sub>2</sub> Oui, mais je fume moins
- <sub>3</sub> Oui, je fume autant que quand je ne suis pas malade
- <sub>7</sub> Je ne sais pas (je fume très peu) ou ne s'applique pas à moi

58. **Habituellement lorsque tu fumes, comment profondément respirez-tu la fumée de cigarette ?**

- <sub>1</sub> Dans ma bouche seulement
- <sub>2</sub> Jusque dans ma gorge
- <sub>3</sub> Peu profondément dans mes poumons
- <sub>4</sub> Profondément dans mes poumons
- <sub>7</sub> Je ne sais pas (je fume très peu) ou ne s'applique pas à moi

59. **Indique à quel point les affirmations suivantes sont vraies pour toi.**

|                                                        | <b>Pas<br/>vrai du<br/>tout</b>       | <b>Un peu<br/>vrai</b>                | <b>Très<br/>vrai</b>                  |
|--------------------------------------------------------|---------------------------------------|---------------------------------------|---------------------------------------|
| Lorsque je suis fâché(e), fumer la cigarette me calme. | <input type="checkbox"/> <sub>1</sub> | <input type="checkbox"/> <sub>2</sub> | <input type="checkbox"/> <sub>3</sub> |
| Les cigarettes sont un bon moyen de combattre l'ennui. | <input type="checkbox"/> <sub>1</sub> | <input type="checkbox"/> <sub>2</sub> | <input type="checkbox"/> <sub>3</sub> |

|                                                                                            |                                       |                                       |                                       |
|--------------------------------------------------------------------------------------------|---------------------------------------|---------------------------------------|---------------------------------------|
| Lorsque quelqu'un me contrarie, fumer m'aide à m'en tirer.                                 | <input type="checkbox"/> <sub>1</sub> | <input type="checkbox"/> <sub>2</sub> | <input type="checkbox"/> <sub>3</sub> |
| Lorsque je me sens déprimé(e), fumer m'aide à me sentir mieux.                             | <input type="checkbox"/> <sub>1</sub> | <input type="checkbox"/> <sub>2</sub> | <input type="checkbox"/> <sub>3</sub> |
| Une cigarette peut me donner de l'énergie lorsque je suis fatigué(e).                      | <input type="checkbox"/> <sub>1</sub> | <input type="checkbox"/> <sub>2</sub> | <input type="checkbox"/> <sub>3</sub> |
| J'aime le goût de la cigarette.                                                            | <input type="checkbox"/> <sub>1</sub> | <input type="checkbox"/> <sub>2</sub> | <input type="checkbox"/> <sub>3</sub> |
| Lorsque je suis seul(e), fumer une cigarette peut m'aider à passer le temps.               | <input type="checkbox"/> <sub>1</sub> | <input type="checkbox"/> <sub>2</sub> | <input type="checkbox"/> <sub>3</sub> |
| Fumer la cigarette me relaxe lorsque je suis nerveux(se).                                  | <input type="checkbox"/> <sub>1</sub> | <input type="checkbox"/> <sub>2</sub> | <input type="checkbox"/> <sub>3</sub> |
| Fumer m'aide à contrôler mon poids.                                                        | <input type="checkbox"/> <sub>1</sub> | <input type="checkbox"/> <sub>2</sub> | <input type="checkbox"/> <sub>3</sub> |
| Lorsque j'ai un problème, fumer la cigarette m'aide à me sentir mieux face à mon problème. | <input type="checkbox"/> <sub>1</sub> | <input type="checkbox"/> <sub>2</sub> | <input type="checkbox"/> <sub>3</sub> |
| Fumer la cigarette m'aide à me concentrer lorsque je fais mes travaux scolaires.           | <input type="checkbox"/> <sub>1</sub> | <input type="checkbox"/> <sub>2</sub> | <input type="checkbox"/> <sub>3</sub> |
| Fumer m'aide à me détendre lorsque je suis stressé(e).                                     | <input type="checkbox"/> <sub>1</sub> | <input type="checkbox"/> <sub>2</sub> | <input type="checkbox"/> <sub>3</sub> |

60. Indique à quel point les affirmations suivantes sont vraies pour toi.

|                                                                                                                     | <b>Pas vrai du tout</b>               | <b>Un peu vrai</b>                    | <b>Très vrai</b>                      |
|---------------------------------------------------------------------------------------------------------------------|---------------------------------------|---------------------------------------|---------------------------------------|
| J'ai un sentiment de contrôle sur mon habitude de fumer. Je peux décider de fumer ou de ne pas fumer quand je veux. | <input type="checkbox"/> <sub>1</sub> | <input type="checkbox"/> <sub>2</sub> | <input type="checkbox"/> <sub>3</sub> |
| Parfois, même quand je me dis que je ne fumerai pas une cigarette, je me retrouve quand même à fumer.               | <input type="checkbox"/> <sub>1</sub> | <input type="checkbox"/> <sub>2</sub> | <input type="checkbox"/> <sub>3</sub> |
| Je me considère comme un(e) fumeur(se) social(e).                                                                   | <input type="checkbox"/> <sub>1</sub> | <input type="checkbox"/> <sub>2</sub> | <input type="checkbox"/> <sub>3</sub> |

|                                                                                                                 |                                       |                                       |                                       |
|-----------------------------------------------------------------------------------------------------------------|---------------------------------------|---------------------------------------|---------------------------------------|
| J'évite d'aller à la maison d'un(e) ami(e) où il n'est pas permis de fumer, même si j'ai le goût de le/la voir. | <input type="checkbox"/> <sub>1</sub> | <input type="checkbox"/> <sub>2</sub> | <input type="checkbox"/> <sub>3</sub> |
| Dans les situations où je dois aller dehors pour fumer, ça vaut la peine même s'il fait froid ou s'il pleut.    | <input type="checkbox"/> <sub>1</sub> | <input type="checkbox"/> <sub>2</sub> | <input type="checkbox"/> <sub>3</sub> |
| Je me sens plus à l'aise avec d'autres fumeur(se)s qu'avec des non-fumeur(se)s.                                 | <input type="checkbox"/> <sub>1</sub> | <input type="checkbox"/> <sub>2</sub> | <input type="checkbox"/> <sub>3</sub> |
| Je passe des heures ou des jours sans fumer, sans même m'en rendre compte.                                      | <input type="checkbox"/> <sub>1</sub> | <input type="checkbox"/> <sub>2</sub> | <input type="checkbox"/> <sub>3</sub> |
| Si je me réveille la nuit, je ressens le besoin de fumer une cigarette.                                         | <input type="checkbox"/> <sub>1</sub> | <input type="checkbox"/> <sub>2</sub> | <input type="checkbox"/> <sub>3</sub> |
| Je fonctionne beaucoup mieux le matin après avoir fumé une cigarette.                                           | <input type="checkbox"/> <sub>1</sub> | <input type="checkbox"/> <sub>2</sub> | <input type="checkbox"/> <sub>3</sub> |
| Je fais moins d'activités physiques ou j'ai arrêté de faire de l'activité physique parce que je fume.           | <input type="checkbox"/> <sub>1</sub> | <input type="checkbox"/> <sub>2</sub> | <input type="checkbox"/> <sub>3</sub> |

61. **As-tu déjà eu des fortes envies de fumer la cigarette ?**

- <sub>1</sub> Non → Va à la question 66  
<sub>2</sub> Oui

62. **À quelle fréquence ressens-tu une forte envie de fumer ?**

- <sub>1</sub> Très rarement  
<sub>2</sub> Parfois  
<sub>3</sub> Souvent  
<sub>4</sub> Très souvent

63. **Quelle est l'intensité de tes fortes envies de fumer une cigarette ?**

- <sub>1</sub> Pas très intense  
<sub>2</sub> Un peu intense  
<sub>3</sub> Intense  
<sub>4</sub> Très intense



**64. Lorsque tu ressens une forte envie de fumer une cigarette, quelle quantité de la cigarette as-tu besoin de fumer pour te satisfaire ?**

- <sub>1</sub> Quelques bouffées
- <sub>2</sub> Moins de la moitié de la cigarette
- <sub>3</sub> Environ la moitié de la cigarette
- <sub>4</sub> La cigarette au complet
- <sub>5</sub> Plus qu'une cigarette au complet

**65. La forte envie de fumer que tu ressens vient... ?**

|              | Pas du tout                           | Un peu                                | Assez                                 | Beaucoup                              |
|--------------|---------------------------------------|---------------------------------------|---------------------------------------|---------------------------------------|
| de ton corps | <input type="checkbox"/> <sub>1</sub> | <input type="checkbox"/> <sub>2</sub> | <input type="checkbox"/> <sub>3</sub> | <input type="checkbox"/> <sub>4</sub> |
| de ta tête   | <input type="checkbox"/> <sub>1</sub> | <input type="checkbox"/> <sub>2</sub> | <input type="checkbox"/> <sub>3</sub> | <input type="checkbox"/> <sub>4</sub> |

**66. Indique à quel point les affirmations suivantes sont vraies pour toi.**

|                                                                                                                                                                                                                                                                           | Pas vrai du tout                      | Un peu vrai                           | Vrai                                  |
|---------------------------------------------------------------------------------------------------------------------------------------------------------------------------------------------------------------------------------------------------------------------------|---------------------------------------|---------------------------------------|---------------------------------------|
| Comparé à lorsque j'ai commencé à fumer la première fois, je dois fumer beaucoup plus maintenant pour me satisfaire.                                                                                                                                                      | <input type="checkbox"/> <sub>1</sub> | <input type="checkbox"/> <sub>2</sub> | <input type="checkbox"/> <sub>3</sub> |
| Comparé à lorsque j'ai commencé à fumer la première fois, je peux fumer beaucoup plus maintenant avant d'avoir mal au cœur ou de me sentir malade.<br><br>OU<br><input type="checkbox"/> <sub>5</sub> Je n'ai jamais eu mal au cœur ou été malade à cause de la cigarette | <input type="checkbox"/> <sub>1</sub> | <input type="checkbox"/> <sub>2</sub> | <input type="checkbox"/> <sub>3</sub> |
| Je me sens étourdi(e) ou j'ai mal au cœur lorsque je fume mon nombre habituel de cigarettes.                                                                                                                                                                              | <input type="checkbox"/> <sub>1</sub> | <input type="checkbox"/> <sub>2</sub> | <input type="checkbox"/> <sub>3</sub> |
| Je manque souvent de cigarettes plus rapidement que j'aurais pensé.                                                                                                                                                                                                       | <input type="checkbox"/> <sub>1</sub> | <input type="checkbox"/> <sub>2</sub> | <input type="checkbox"/> <sub>3</sub> |
| Je passe beaucoup de temps à me procurer des cigarettes (faire un                                                                                                                                                                                                         | <input type="checkbox"/> <sub>1</sub> | <input type="checkbox"/> <sub>2</sub> | <input type="checkbox"/> <sub>3</sub> |

|                                                                                                                                 |                                       |                                       |                                       |
|---------------------------------------------------------------------------------------------------------------------------------|---------------------------------------|---------------------------------------|---------------------------------------|
| détour pour me rendre à un magasin où je sais qu'ils vont m'en vendre, ou trouver quelqu'un qui les achètera pour moi).         |                                       |                                       |                                       |
| Je passe beaucoup de temps à fumer la cigarette (fumer une cigarette après l'autre, fumer beaucoup tout au long de la journée). | <input type="checkbox"/> <sub>1</sub> | <input type="checkbox"/> <sub>2</sub> | <input type="checkbox"/> <sub>3</sub> |
| J'ai cessé de me tenir avec certaines personnes parce que je fume.                                                              | <input type="checkbox"/> <sub>1</sub> | <input type="checkbox"/> <sub>2</sub> | <input type="checkbox"/> <sub>3</sub> |

**67. Maintenant, pour finir voici plusieurs questions sur le fait de cesser de fumer. En ce moment, à quel point veux-tu arrêter de fumer complètement et pour toujours ?**

- <sub>1</sub> Pas du tout
- <sub>2</sub> Un peu
- <sub>3</sub> Assez
- <sub>4</sub> Beaucoup

**68. Durant les 3 derniers mois, as-tu sérieusement essayé de cesser de fumer complètement et pour toujours ?**

- <sub>1</sub> Non → Va à la question 70
- <sub>2</sub> Oui, 1 fois
- <sub>3</sub> Oui, 2 fois ou plus

**69. Pense à la dernière fois que tu as essayé d'arrêter de fumer. As-tu cessé de fumer complètement (pendant quelque temps) ?**

- <sub>1</sub> Non, mais j'ai beaucoup diminué
- <sub>2</sub> Non, mais j'ai un peu diminué
- <sub>3</sub> Non, la quantité de cigarettes que je fume n'a pas du tout changé
- <sub>4</sub> Oui → j'ai arrêté complètement pendant  jours  
écris le nombre de jour
- <sub>5</sub> Oui → j'ai arrêté complètement et je n'ai pas fumé depuis

70. En ce moment, à quel point as-tu confiance que tu peux cesser (ou as cessé) de fumer complètement pour toujours ?

- <sub>1</sub> Je suis très confiant(e)
- <sub>2</sub> Je suis assez confiant(e)
- <sub>3</sub> Je ne suis pas très confiant(e)
- <sub>4</sub> Je ne suis pas confiant(e) du tout

71. Quelle est la RAISON PRINCIPALE pour laquelle tu n'arrêtes pas de fumer maintenant. Coche **UNE** case seulement.

- <sub>1</sub> Je ne veux pas arrêter, j'aime fumer
- <sub>2</sub> C'est devenu une routine qui serait très difficile à briser
- <sub>3</sub> C'est trop difficile, parce que tout le monde autour de moi fume
- <sub>4</sub> Mes fortes envies de fumer sont trop intenses
- <sub>5</sub> J'ai trop de stress dans ma vie
- <sub>6</sub> Je me sens mal lorsque j'arrête de fumer
- <sub>7</sub> Je n'ai pas besoin d'arrêter (car je fume très peu actuellement)
- <sub>8</sub> Une autre raison → Précise

AQ26. As-tu l'intention d'arrêter de fumer complètement pour toujours (réponds à chaque question)...

|                             | Non                                   | Oui                                   | Je ne sais pas                        |
|-----------------------------|---------------------------------------|---------------------------------------|---------------------------------------|
| Dans le prochain mois ?     | <input type="checkbox"/> <sub>1</sub> | <input type="checkbox"/> <sub>2</sub> | <input type="checkbox"/> <sub>7</sub> |
| Dans les 6 prochains mois ? | <input type="checkbox"/> <sub>1</sub> | <input type="checkbox"/> <sub>2</sub> | <input type="checkbox"/> <sub>7</sub> |
