# Supplementary material
Source: PubMed Central journal article supplement (PMC1513423)

**Appendix 4:** Cumulative probability of attaining each milestone of smoking onset in subgroup of participants who reported smoking a whole cigarette ( $n = 214$ ), according to number of months after first whole cigarette smoked. (See Methods of main article for definitions of milestones [available at [www.cmaj.ca/cgi/content/full/175/3/255](http://www.cmaj.ca/cgi/content/full/175/3/255)].)

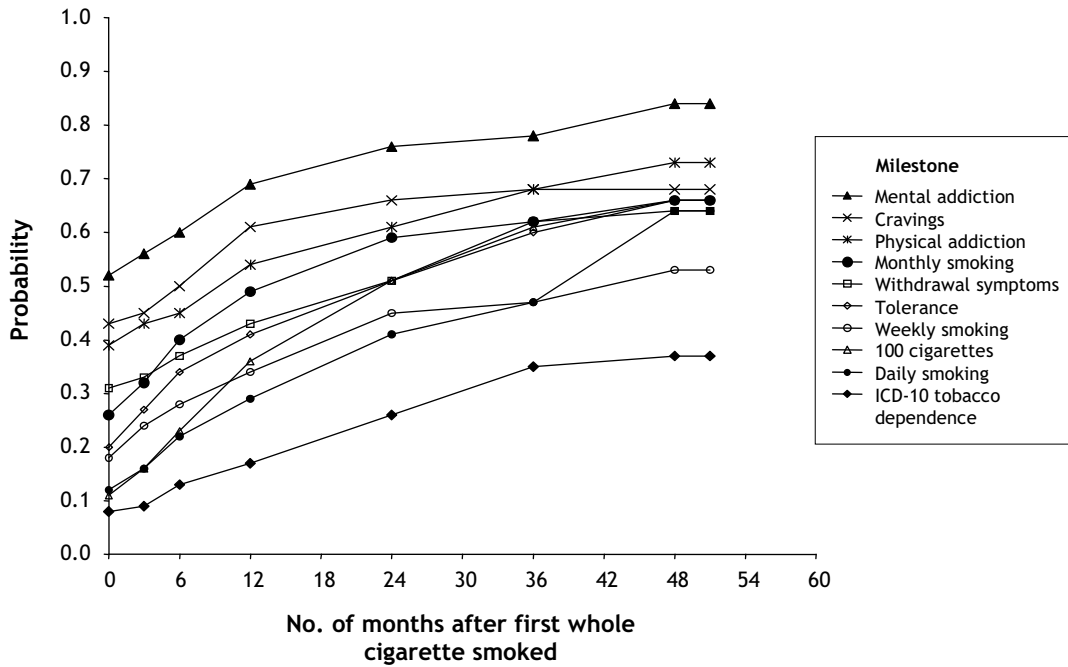

Supplement: cmaj_175_3_255__4.pdf [file cmaj_175_3_255__4.pdf]
