# Supplementary material
Source: PubMed Central journal article supplement (PMC1513423)

**Appendix 5:** Cumulative probability of attaining each milestone of smoking onset in subgroup of participants who reported experiencing craving symptoms ( $n = 141$ ), according to number of months after first experiencing craving symptoms. (See Methods of main article for definitions of milestones [available at [www.cmaj.ca/cgi/content/full/175/3/255](http://www.cmaj.ca/cgi/content/full/175/3/255)].)

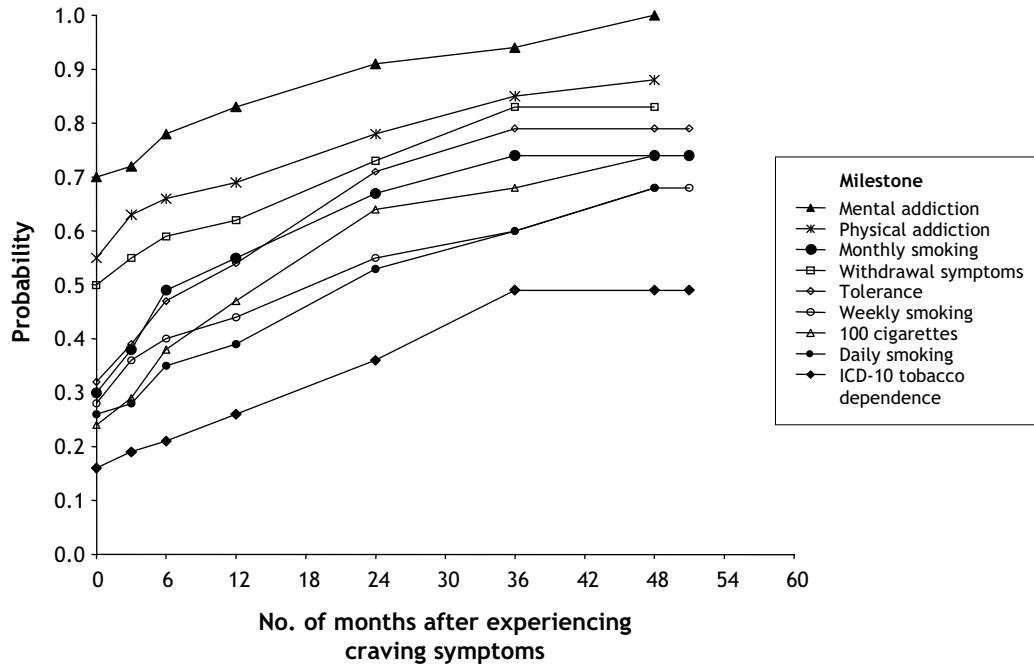

Supplement: cmaj_175_3_255__5.pdf [file cmaj_175_3_255__5.pdf]
